1 **SARS-CoV-2 Omicron XBB.1.5 may be a cautionary variant by *in silico***  
2 **study**

3  
4 Aki Sugano<sup>1,2,3,†</sup>, Haruyuki Kataguchi<sup>2,4,5,†</sup>, Mika Ohta<sup>2,3,5,7</sup>,  
5 Yoshiaki Someya<sup>2,8</sup>, Shigemi Kimura<sup>3</sup>, Yoshimasa Maniwa<sup>3</sup>,  
6 Toshihide Tabata<sup>4</sup>, Yutaka Takaoka<sup>2,3,5,6,7,8,\*</sup>  
7

8 <sup>1</sup> Center for Clinical Research, Toyama University Hospital, Toyama 930-0194, Japan

9 <sup>2</sup> Data Science Center for Medicine and Hospital Management, Toyama University  
10 Hospital, Toyama 930-0194, Japan

11 <sup>3</sup> Department of Medical Systems, Kobe University Graduate School of Medicine,  
12 Kobe, Hyogo 650-0017, Japan

13 <sup>4</sup> Laboratory for Biological Information Processing, Graduate School of Science and  
14 Engineering, University of Toyama, Toyama 930-0887, Japan

15 <sup>5</sup> Department of Computational Drug Design and Mathematical Medicine, Graduate  
16 School of Medicine and Pharmaceutical Sciences, University of Toyama, Toyama 930-  
17 0194, Japan

18 <sup>6</sup> Center for Advanced Antibody Drug Development, University of Toyama, Toyama  
19 930-0194, Japan

20 <sup>7</sup> Life Science Institute, Kobe Tokiwa University, Kobe, Hyogo 653-0838, Japan

21 <sup>8</sup> Center for Data Science and Artificial Intelligence Research Promotion, Toyama  
22 University Hospital, Toyama 930-0194, Japan

23  
24 **Running head:** New Omicron variant XBB.1.5 may be most infective than preexisting  
25 variants

26  
27 **\*Corresponding author:**

28 Phone: +81-76-434-7311, Fax: +81-76-434-5129

29 *E-mail address:* ytakaoka@med.u-toyama.ac.jp (Y. Takaoka).

30 †: These authors contributed equally to this work.

31  
32 **Abbreviations:** spike protein gene, S gene; angiotensin-converting enzyme 2, ACE2;  
33 receptor binding domain, RBD

34 **ABSTRACT**

35 In this research, we aimed to predict the relative risk of the recent new variants of SARS-  
36 CoV-2 as based on our previous research. First, we performed the molecular docking  
37 simulation analyses of the spike proteins with human angiotensin-converting enzyme 2  
38 (ACE2) to understand the binding affinities to human cells of three new variants of  
39 SARS-CoV-2, Omicron BQ.1, XBB.1 and XBB.1.5 Then, three variants were subjected  
40 to determine the evolutionary distance of the spike protein gene (S gene) from the Wuhan,  
41 Omicron BA.1 and Omicron BA.4/5 variants, to appreciate the changes in the S gene.  
42 The result indicated that the XBB.1.5 had the highest binding affinity level of the spike  
43 protein with ACE2 and the longest evolutionary distance of the S gene. It suggested that  
44 the XBB.1.5 may be infected farther and faster than can infections of preexisting variants.

45

46 **Keywords:** SARS-CoV-2; COVID-19; Spike protein; Evolutionary distance; Binding  
47 affinity

48

49

## 50 **1. Introduction**

51 Currently the infection by the new Omicron variant of SARS-CoV-2 has an ongoing  
52 epidemic disease successively. In early 2023, Omicron BQ.1, XBB.1 and XBB.1.5 were  
53 discovered in patients and is thought to present a particular risk in as much as it may  
54 induce a coming epidemic. Previously, we reported *in silico* infectivity of SARS-CoV-2  
55 variants—Alpha, Beta, Gamma, Delta, Omicron BA.1, BA.2 and BA.2.75 as ratio per  
56 Wuhan variant and the absolute evolutionary distance of S gene between Wuhan and each  
57 variant [1]. In this research, we report the predicted risks for Omicron BQ.1, XBB.1 and  
58 XBB.1.5 which were recently recognized as being causes of epidemic diseases. For this  
59 purpose, we utilized the analyses of the docking simulation and the evolutionary distance  
60 that we established in our previous research [1-3].

61

## 62 **2. Materials and methods**

63 *2.1 Determination of the absolute evolutionary distances between the Wuhan*  
64 *variant and variant spike protein genes (S genes), and docking affinities of the*  
65 *different spike proteins with ACE2*

66

67 We analyzed the absolute evolutionary distances of the S gene from the Wuhan, Omicron  
68 BA.1 or Omicron BA.4/5 variants for the variants —Alpha, Beta, Gamma, Delta, Omicron  
69 BA.1, BA.2, BA.4/5, BA.2.75, BQ.1, XBB.1 and XBB.1.5 via the ClustalW program [4]  
70 and FastTree program [5]. We obtained the sequences of the S gene by searching NCBI  
71 (MN908947 for Wuhan, OW519813 for Alpha, OM791325 for BA.1) or the EpiCoV  
72 database of GISAID (<https://gisaid.org>) for the complete sequence of the S gene  
73 (EPI\_ISL\_5142896 for Beta, EPI\_ISL\_14534452 for Gamma, EPI\_ISL\_4572746 for  
74 Delta, EPI\_ISL\_13580480 for BA.2, EPI\_ISL\_13304903 for BA.4/5, and  
75 EPI\_ISL\_14572678 for BA.2.75, EPI\_ISL\_15638667 for BQ.1, EPI\_ISL\_15427610 for  
76 XBB.1, EPI\_ISL\_1658922 for XBB.1.5).

77 We obtained the information for the amino acid substitutions (see Table 1) of the spike  
78 proteins from the CoVariants website (<https://covariants.org>). We then used the amino  
79 acid sequences for the analyses of the three-dimensional structures of each variant spike  
80 protein according to our previous research [1].

81 To clarify the ability to enter human cells of each variant, we used docking simulation to  
82 analyze the docking affinity of the receptor binding domain (RBD) of each variant spike  
83 protein with ACE2 [3]. In this research, we defined the binding affinity as the most stable  
84 score in the docking results with the correct binding mode.

85

## 86 **3. Results**

87 *3.1. Absolute evolutionary distances for S gene variants and results of docking of*  
88 *the RBD with ACE2 protein*

89 Table 2 shows the binding affinities of the RBD of the spike protein with human ACE2

90 (ratio per Wuhan), which we determined from the docking simulation.  
91 The variants with longer evolutionary distances from the Wuhan, Omicron BA.1 or  
92 BA.4/5 suggest a tendency toward causing more epidemics based on our previous  
93 research [3]. The Omicron XBB.1.5 had highest binding affinity leading to the potential  
94 of high risk to enter human cells.  
95 Table 2 also shows the absolute evolutionary distances of the S gene between the Wuhan  
96 variant and each of the other variants, as well as the evolutionary distances between the  
97 Omicron BA.1 or BA.4/5 variant. This data suggests that the Omicron XBB.1.5 had the  
98 potential of weak vaccine effect because it has the long absolute evolutionary distance  
99 from the three variants which are the basis to develop vaccine.

100

#### 101 **4. Discussion**

102 In this research, two factors were chosen for an indicator of the virus infectivity based on  
103 our previous report [1] as follows: (1) binding affinities between the RBD of the spike  
104 protein and human ACE2, the ability of the virus to enter human cells; (2) evolutionary  
105 distance of S gene, the effect of vaccines by the neutralizing antibody in humans. So, we  
106 analyzed the binding affinity with ACE2 and the evolutionary distance of the S gene  
107 which were calculated from the Wuhan, Omicron BA.1 and Omicron BA.4/5, respectively.  
108 The binding affinity of each new RBD in the spike protein with ACE2 are greater than  
109 preexisting variants except Omicron XBB.1. The evolutionary distance of recent new  
110 Omicron variants, BQ.1, XBB.1 and XBB.1.5 suggests the following possibilities:  
111 Omicron BQ.1. has short evolutionary distance from the BA.4/5, which suggests that  
112 BA.4/5 based vaccine can be effective to this variant; Omicron XBB.1 and XBB.1.5 have  
113 long evolutionary distance which suggests that currently available vaccines have low  
114 effect. Thus, the Omicron XBB.1.5 showed the highest level of binding affinity of the  
115 spike protein with the human ACE2 protein compared with the other all variants, and the  
116 S gene evolutionary distance from the three variants for the current vaccine were longest.  
117 This result suggests that the XBB.1.5 infection can spread farther than can infections of  
118 preexisting variants. Indeed, Yue et al. reported that the enhanced receptor-binding  
119 affinity were shown in XBB.1.5 under the Surface plasmon resonance analysis [6].  
120 Tamura et al. reported that the XBB.1 is the most greatly resistant variant to BA.2/5  
121 infection sera ever and has strong ability of entering human cells than BA.2.75 [7]. These  
122 reports were consistent with our results *in silico*.  
123 But in this research, the risk for exacerbation of SARS-CoV-2 cannot be appreciated via  
124 these two factors, that is, our results indicate the need for a great caution in managing  
125 XBB.1.5, because the number of severely ill patients or sufferers will be increased along  
126 with the increased number of infected individuals even if this variant has low risk for  
127 exacerbation.

128

#### 129 **5. Conclusion**

130 We indicated here that the Omicron XBB.1.5 of SARS-CoV-2 has the longest  
131 evolutionary distance of the S gene from the Wuhan, Omicron BA.1 and Omicron BA.4/5  
132 and the highest level of binding affinity by the docking simulation for spike protein with  
133 ACE2. These results suggested that Omicron XBB.1.5 poses a greater risk in the  
134 pandemic than other variants.

135

### 136 **Funding**

137 This work was supported by JSPS Grant-in-Aid for Scientific Research (grant numbers  
138 21K12110 to Y.T. and 22K12261 to A.S).

139

### 140 **Author contributions**

141 Y.T. conceived and designed this research. Y.T., A.S., H.K., and M.O. performed the  
142 analyses and acquired the data. Y.T., A.S., H.K., and M.O. interpreted the data. Y.T. and  
143 A.S. wrote the draft, and all authors reviewed and approved the manuscript.

144

### 145 **Ethical approval statement**

146 This research is not applicable because we performed computer analyses by using  
147 sequence data obtained from public database.

148

### 149 **Declaration of Competing Interest**

150 Authors declare no conflict of interest.

151

### 152 **Data availability**

153 Data that support the findings of this study are available from the corresponding author  
154 upon reasonable request, except publicly available data sources.

155

### 156 **Acknowledgments**

157 We gratefully acknowledge all data contributors, i.e., the authors, their originating  
158 laboratories that obtained the specimens, and their submitting laboratories for generating  
159 the genetic sequences and metadata for sharing this information via the GISAID  
160 Initiative; and all data provided by CoVariants, on which this research is based.

161

### 162 **References**

163

164 1. Sugano A, Takaoka Y, Kataguchi H, Ohta M, Kimura S, et al. SARS-CoV-2  
165 Omicron BA.2.75 Variant May Be Much More Infective than Preexisting Variants Based  
166 on In Silico Model. *Microorganisms* 10 (2022): 2090.  
167 <https://doi.org/10.3390/microorganisms10102090>.

- 168 2. Hagiwara M, Takeuchi F, Sugano A, Yoneshige A, Inoue T, et al. Indigo plant  
169 leaf extract inhibits the binding of SARS-CoV-2 spike protein to angiotensin-converting  
170 enzyme 2. *Exp Ther Med* 23 (2022): 274. <https://doi.org/10.3892/etm.2022.11200>.
- 171 3. Takaoka Y, Sugano A, Morinaga Y, Ohta M, Miura K, et al. Prediction of  
172 infectivity of SARS-CoV2: Mathematical model with analysis of docking simulation for  
173 spike proteins and angiotensin-converting enzyme 2. *Microb Risk Anal* 22 (2022):  
174 100227. <https://doi.org/10.1016/j.mran.2022.100227>.
- 175 4. Thompson JD, Higgins DG, Gibson TJ. CLUSTAL W: improving the sensitivity  
176 of progressive multiple sequence alignment through sequence weighting, position-  
177 specific gap penalties and weight matrix choice. *Nucleic Acids Res* 22 (1994): 4673-4680.  
178 <https://doi.org/10.1093/nar/22.22.4673>.
- 179 5. Price MN, Dehal PS, Arkin AP. FastTree: computing large minimum evolution  
180 trees with profiles instead of a distance matrix. *Mol Biol Evol* 26 (2009): 1641-1650.  
181 <https://doi.org/10.1093/molbev/msp077>.
- 182 6. Yue C, Song W, Wang L, Jian F, Chen X, et al. Enhanced transmissibility of  
183 XBB.1.5 is contributed by both strong ACE2 binding and antibody evasion. *bioRxiv*  
184 (2023). <https://doi.org/10.1101/2023.01.03.522427>.
- 185 7. Tamura T, Ito J, Uriu K, Zahradnik J, Kida I, et al. Virological characteristics of  
186 the SARS-CoV-2 XBB variant derived from recombination of two Omicron subvariants.  
187 *bioRxiv* (2022). <https://doi.org/10.1101/2022.12.27.521986>.
- 188

Table 1.

Amino acid substitutions of spike proteins of SARS-CoV-2 variants.

| SARS-CoV-2 variants<br>(Pango Lineage) | Mutations in spike protein                                                                                                                                                                                                                                                                                                                                                           |
|----------------------------------------|--------------------------------------------------------------------------------------------------------------------------------------------------------------------------------------------------------------------------------------------------------------------------------------------------------------------------------------------------------------------------------------|
| Alpha<br>(B.1.1.7)                     | H69-V70del, Y144del, <b>N501Y</b> , A570D, D614G, P681H, T716I, S982A, D1118H                                                                                                                                                                                                                                                                                                        |
| Beta<br>(B.1.351)                      | D80A, D215G, L241-A243del, <b>K417N</b> , <b>E484K</b> , <b>N501Y</b> , D614G, A701V                                                                                                                                                                                                                                                                                                 |
| Epsilon<br>(B.1.427/9)                 | S13I, W152C, <b>L452R</b> , D614G                                                                                                                                                                                                                                                                                                                                                    |
| Iota<br>(B.1.526)                      | L5F, T95I, D253G, <b>E484K</b> , D614G, A701V                                                                                                                                                                                                                                                                                                                                        |
| Gamma<br>(P.1)                         | L18F, T20N, P26S, D138Y, R190S, <b>K417T</b> , <b>E484K</b> , <b>N501Y</b> , D614G, H655Y, T1027I, V1176F                                                                                                                                                                                                                                                                            |
| Delta<br>(B.1.617.2)                   | T19R, E156-F157del, R158G, <b>L452R</b> , <b>T478K</b> , D614G, P681R, D950N                                                                                                                                                                                                                                                                                                         |
| Omicron BA.1<br>(B.1.1.529/BA.1)       | A67V, H69-V70del, T95I, G142D, V143-Y145del, N211del, L212I, ins214EPE, <b>G339D</b> , <b>S371L</b> , <b>S373P</b> , <b>S375F</b> , <b>K417N</b> , <b>N440K</b> , <b>G446S</b> , <b>S477N</b> , <b>T478K</b> , <b>E484A</b> , <b>Q493R</b> , <b>G496S</b> , <b>Q498R</b> , <b>N501Y</b> , <b>Y505H</b> , T547K, D614G, H655Y, N679K, P681H, N764K, D796Y, N856K, Q954H, N969K, L981F |
| Omicron BA.2<br>(B.1.1.529/BA.2)       | T19I, L24-P26del, A27S, G142D, V213G, <b>G339D</b> , <b>S371F</b> , <b>S373P</b> , <b>S375F</b> , <b>T376A</b> , <b>D405N</b> , <b>R408S</b> , <b>K417N</b> , <b>N440K</b> , <b>S477N</b> , <b>T478K</b> , <b>E484A</b> , <b>Q493R</b> , <b>Q498R</b> , <b>N501Y</b> , <b>Y505H</b> , D614G, H655Y, N679K, P681H, N764K, D796Y, Q954H, N969K                                         |
| Omicron BA.4/5<br>(B.1.1.529/BA.4/5)   | T19I, L24-P26del, A27S, H69-V70del, G142D, V213G, <b>G339D</b> , <b>S371F</b> , <b>S373P</b> , <b>S375F</b> , <b>T376A</b> , <b>D405N</b> , <b>R408S</b> , <b>K417N</b> , <b>N440K</b> , <b>L452R</b> , <b>S477N</b> , <b>T478K</b> , <b>E484A</b> , <b>F486V</b> , <b>Q498R</b> , <b>N501Y</b> , <b>Y505H</b> , D614G, H655Y, N679K, P681H, N764K, D796Y, Q954H, N969K,             |

---

|                                        |                                                                                                                                                                                                                                                                                                           |
|----------------------------------------|-----------------------------------------------------------------------------------------------------------------------------------------------------------------------------------------------------------------------------------------------------------------------------------------------------------|
| Omicron BA.2.75<br>(B.1.1.529/BA.2.75) | T19I, L24-P26del, A27S, G142D, K147E, W152R, F157L, I210V, V213G, G257S, <b>G339H, S371F, S373P, S375F, T376A, D405N, R408S, K417N, N440K, G446S, N460K, S477N, T478K, E484A, R493Q, Q498R, N501Y, Y505H</b> , D614G, H655Y, N679K, P681H, N764K, D796Y, Q954H, N969K                                     |
| Omicron BQ.1<br>(B.1.1.529/BQ.1)       | T19I, L24-P26del, A27S, H69-V70del, G142D, V213G, <b>G339D, S371F, S373P, S375F, T376A, D405N, R408S, K417N, N440K, K444T, L452R, N460K, S477N, T478K, E484A, F486V, Q498R, N501Y, Y505H</b> , D614G, H655Y, N679K, P681H, N764K, D796Y, Q954H, N969K                                                     |
| Omicron XBB.1<br>(B.1.1.529/XBB)       | T19I, L24-P26del, A27S, V83A, G142D, Y144del, H146Q, Q183E, V213E, <b>G339H, R346T, L368I, S371F, S373P, S375F, T376A, D405N, R408S, K417N, N440K, V445P, G446S, N460K, S477N, T478K, E484A, F486S, F490S, R493Q, Q498R, N501Y, Y505H</b> , D614G, H655Y, N679K, P681H, N764K, D796Y, Q954H, N969K        |
| Omicron XBB.1.5<br>(B.1.1.529/XBB.1.5) | T19I, L24-P26del, A27S, V83A, G142D, Y144del, H146Q, Q183E, V213E, G252V, <b>G339H, R346T, L368I, S371F, S373P, S375F, T376A, D405N, R408S, K417N, N440K, V445P, G446S, N460K, S477N, T478K, E484A, F486P, F490S, R493Q, Q498R, N501Y, Y505H</b> , D614G, H655Y, N679K, P681H, N764K, D796Y, Q954H, N969K |

---

**Bold**, amino acids in RBD.

The information of amino acid substitutions are obtained from the following sources: Alpha, Beta and Gamma, <https://covdb.stanford.edu/variants/>; Delta, <https://covariants.org/variants/21A.Delta>; Omicron BA.1, <https://www.cdc.gov/coronavirus/2019-ncov/science/science-briefs/scientific-brief-omicron-variant.html>; Omicron BA.2, Perumal et al. (J Med Virol, DOI: 10.1002/jmv.27601, 2022), Omicron BA.4/5, <https://covariants.org/variants/22A.Omicron>, Omicron BA.2.75, <https://covariants.org/variants/22D.Omicron>, Omicron BQ.1, <https://covariants.org/variants/21E.Omicron>, Omicron XBB.1, <https://covariants.org/variants/22F.Omicron>, Omicron XBB.1.5, Yue et al. (bioRxiv, DOI: <https://doi.org/10.1101/2023.01.03.522427>, 2023)



Table 2. The evolutionary distance of the S gene and the binding affinity of the spike protein with ACE2 (ratio per Wuhan variant). The right side indicates a new mutation.

| Variants                                                                          | Wuhan | Alpha   | Beta    | Gamma | Delta     | Omicron<br>BA.1    | Omicron<br>BA.2    | Omicron<br>BA.4/5    | Omicron<br>BA.2.75    | Omicron<br>BQ.1    | Omicron<br>XBB.1    | Omicron<br>XBB.1.5    |
|-----------------------------------------------------------------------------------|-------|---------|---------|-------|-----------|--------------------|--------------------|----------------------|-----------------------|--------------------|---------------------|-----------------------|
| Pango Lineage                                                                     | B     | B.1.1.7 | B.1.351 | P.1   | B.1.617.2 | B.1.1.529/<br>BA.1 | B.1.1.529/<br>BA.2 | B.1.1.529/<br>BA.4/5 | B.1.1.529/<br>BA.2.75 | B.1.1.529/<br>BQ.1 | B.1.1.529/<br>XBB.1 | B.1.1.529/<br>XBB.1.5 |
| Binding affinity of<br>S protein with ACE2<br>(ratio per Wuhan)                   | 1     | 1.18    | 1.23    | 1.31  | 2.10      | 1.55               | 2.46               | 2.15                 | 2.90                  | 3.09               | 1.89                | 3.04                  |
| Absolute evolutionary<br>distance of the S gene<br>(from Wuhan) $\times 10^{-3}$  | -     | 2.06    | 2.05    | 3.52  | 3.23      | 11.49              | 8.27               | 9.15                 | 10.91                 | 10.03              | 12.40               | 13.06                 |
| Absolute evolutionary<br>distance of the S gene<br>(from BA.1) $\times 10^{-3}$   | -     | -       | -       | -     | -         | -                  | 5.62               | 6.51                 | 8.27                  | 7.39               | 9.75                | 10.42                 |
| Absolute evolutionary<br>distance of the S gene<br>(from BA.4/5) $\times 10^{-3}$ | -     | -       | -       | -     | -         | -                  | -                  | -                    | 2.94                  | 0.88               | 4.42                | 5.09                  |
